# Supplementary material
Source: PubMed Central journal article supplement (PMC2946158)

JAGU1733V

SUPPLEMENTARY MATERIAL for reviewers

## Experimental Measurement of Aromatic Stacking Affinities in the Context of Duplex DNA

Kevin M. Guckian, Barbara A. Schweitzer, Rex X.-F. Ren, Charles J. Sheils, Pamela L. Paris and Eric T. Kool\*, Department of Chemistry and Department of Biochemistry, University of Rochester, Rochester, NY 14627

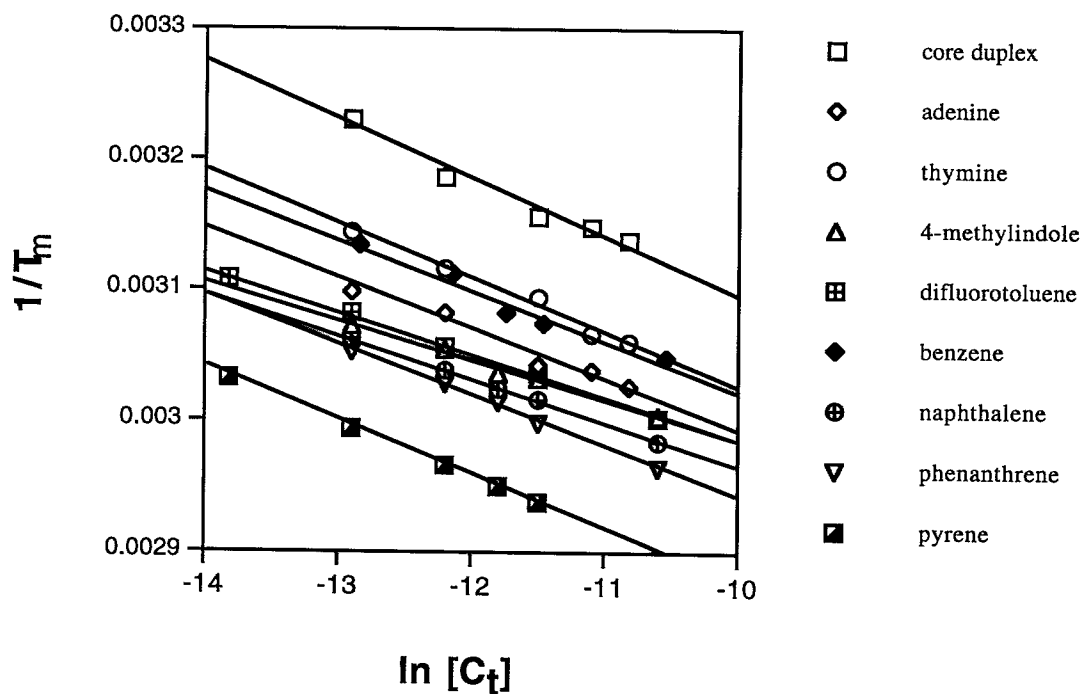

**Figure 1** (suppl.). Plots of thermal denaturation data for the nine duplexes in this study. Shown are data for  $1/T_m$  vs.  $\ln$  [oligonucleotide concentration].

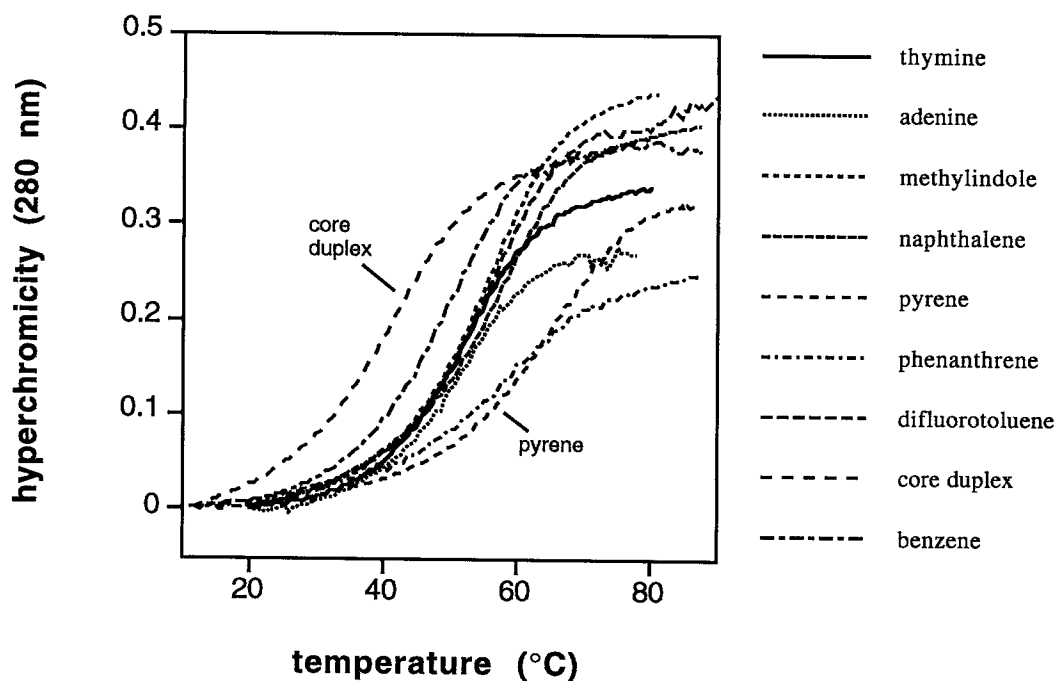

**Figure 2 (suppl.).** Representative thermal denaturation curves for the nine duplexes in this study. Shown are data for hyperchromicity at 280 nm vs. temperature. Conditions: 5  $\mu$ M DNA, 1M NaCl, 10 mM Na $\cdot$ phosphate buffer (pH 7.0).

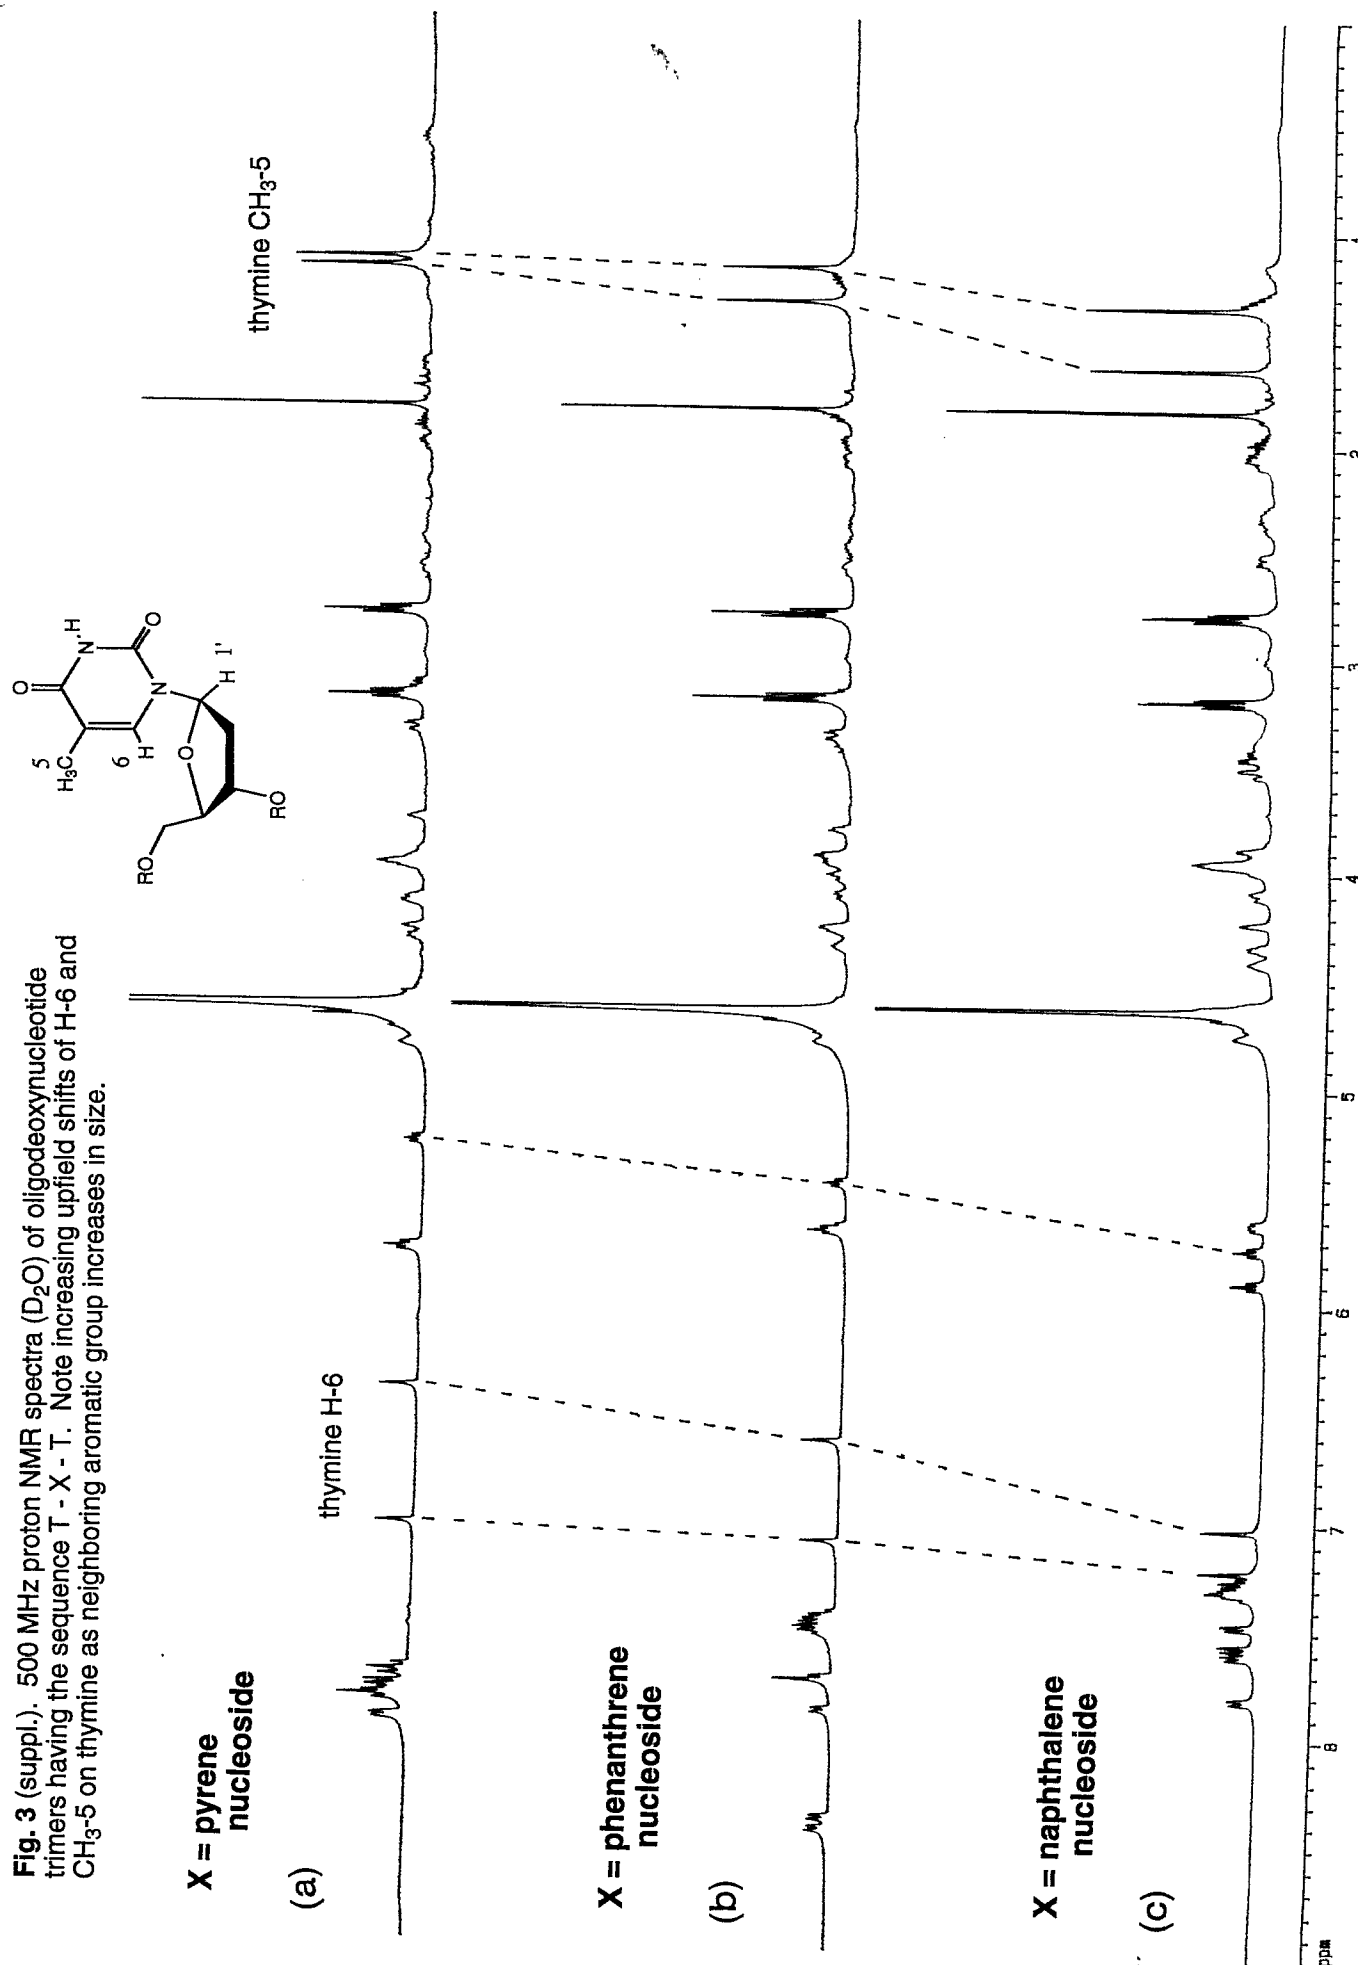

Supplement: NIHMS157573-supplement-supporting_data.pdf [file NIHMS157573-supplement-supporting_data.pdf]
